# Supplementary figures and images for: Long Non-Coding RNAs Associated with Metabolic Traits in Human White Adipose Tissue
Source: PubMed Central journal article supplement — eBioMedicine. 2018 Mar 15;30:248–60. doi: 10.1016/j.ebiom.2018.03.010 (PMC5952343; doi:10.1016/j.ebiom.2018.03.010), 2018-03-15

# Supp\_figure 1

A

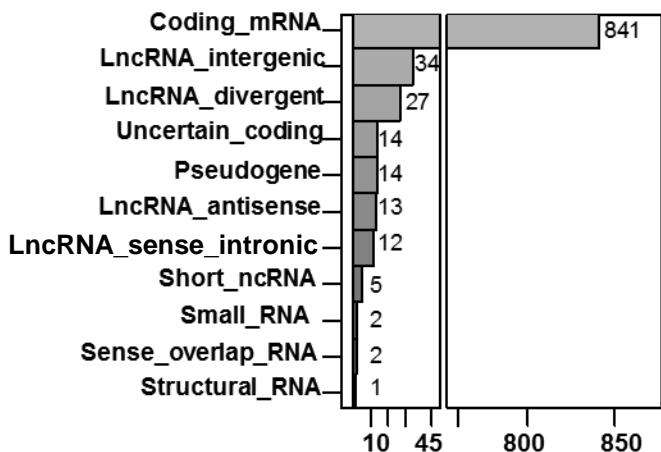

C

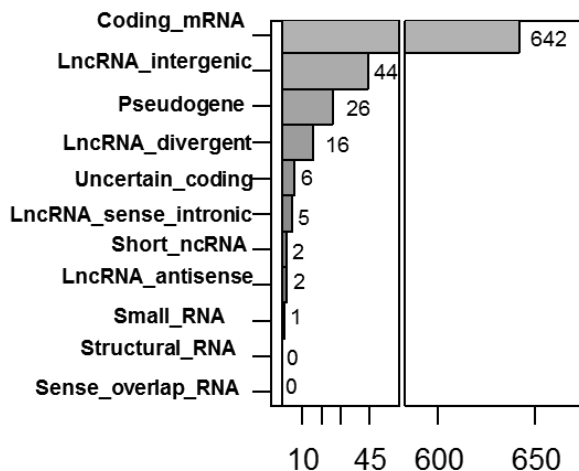

B

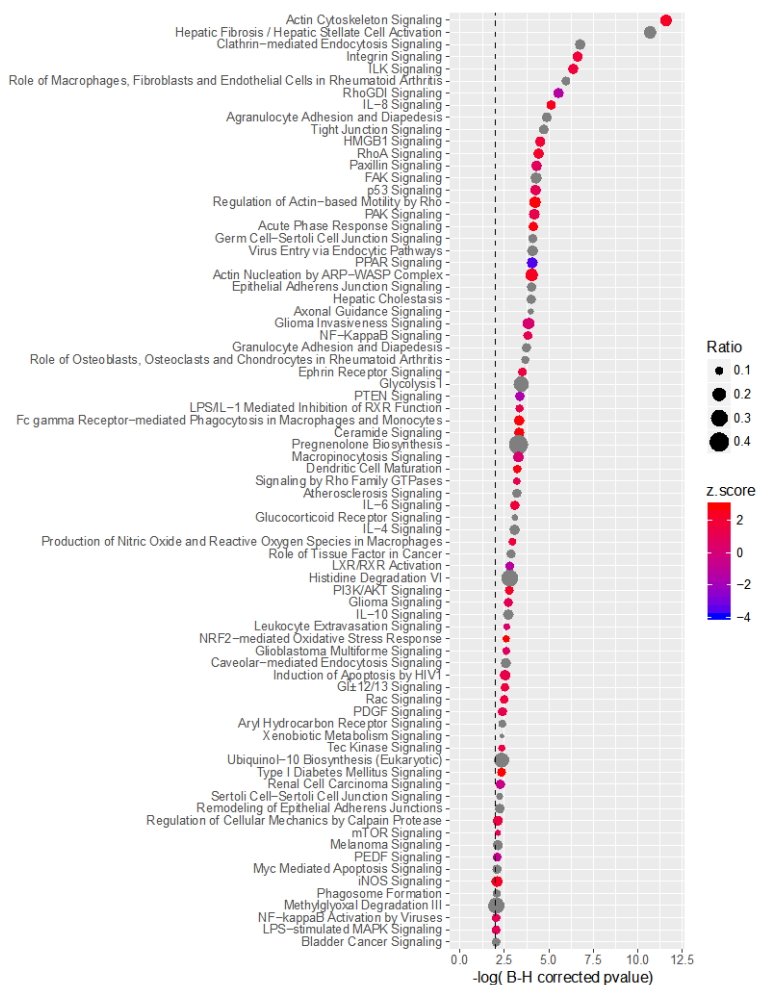

D

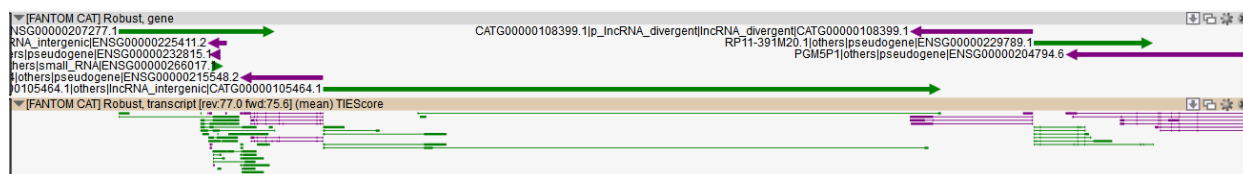

## Supp\_Figure 2

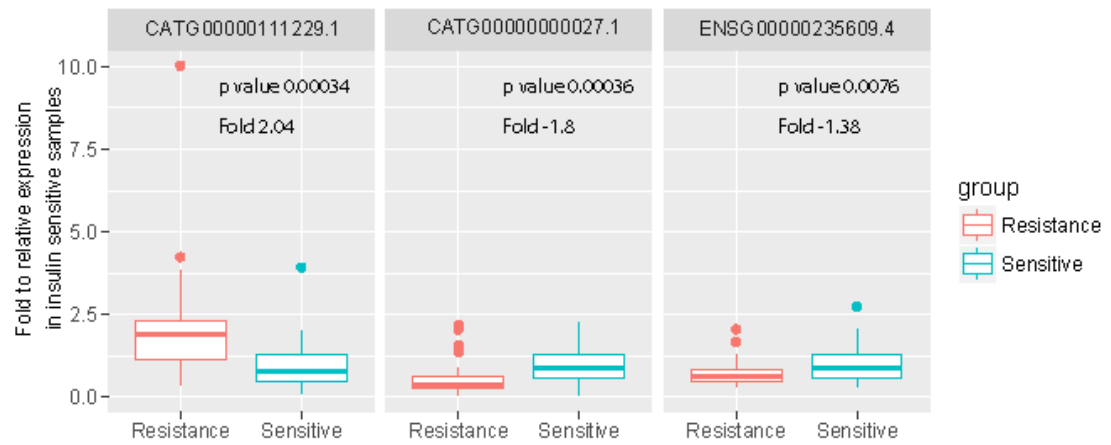

# Supp\_Figure 3

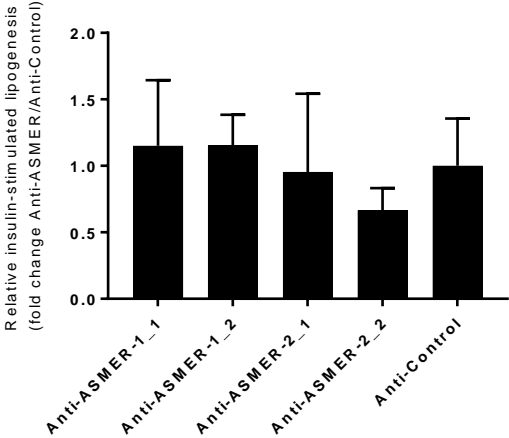

Supplement: mmc2.pdf [file mmc2.pdf]
